# Supplementary material
Source: publisher site journal article supplement (https://www.dovepress.com/article/222323)
Supplement: Supplementary file 1 [file get_supplementary_file.php]

**Supplemental Table 1. Primers used for quantitative real-time RT-PCR.**

| **Gene** | **Primer sequence 5'-3'** |
| --- | --- |
| ARAP1 | 5'-AGCATCTTCTACTCGAGTGTTG-3' |
|  | 5'-GCGTCTGATGATGAGTCAATTG-3' |
| AT1R | 5'- TTGTCCACCCGATGAAGTCTC-3' |
|  | 5'- AAAAGCGCAAACAGTGATATTGG-3' |
| NOX2 | 5′-TTGGTTCGGTTTTGG-3′ |
|  | 5′-TTGGGGCACTTGACA-3′ |
| NOX4 | 5'-TGCCTGCTCATTTGGCTGT-3' |
|  | 5'-CCGGCACATAGGTAAAAGGATG-3' |
| FN | 5'-GACAACCGAGGAAACC-3' |
|  | 5'-CAGTGAAGGAGCCAGAT-3' |
| Collagen IV | 5'-GTCGTGGAGACATCGG-3' |
|  | 5'-CCTGCCTCACCCTTT-3' |
| GAPDH | 5'-CGTATCGGACGCCTGGTT-3' |
|  | 5'-CGTGGGTAGAGTCATACTGGAAC-3' |

**Supplemental Figure 1**


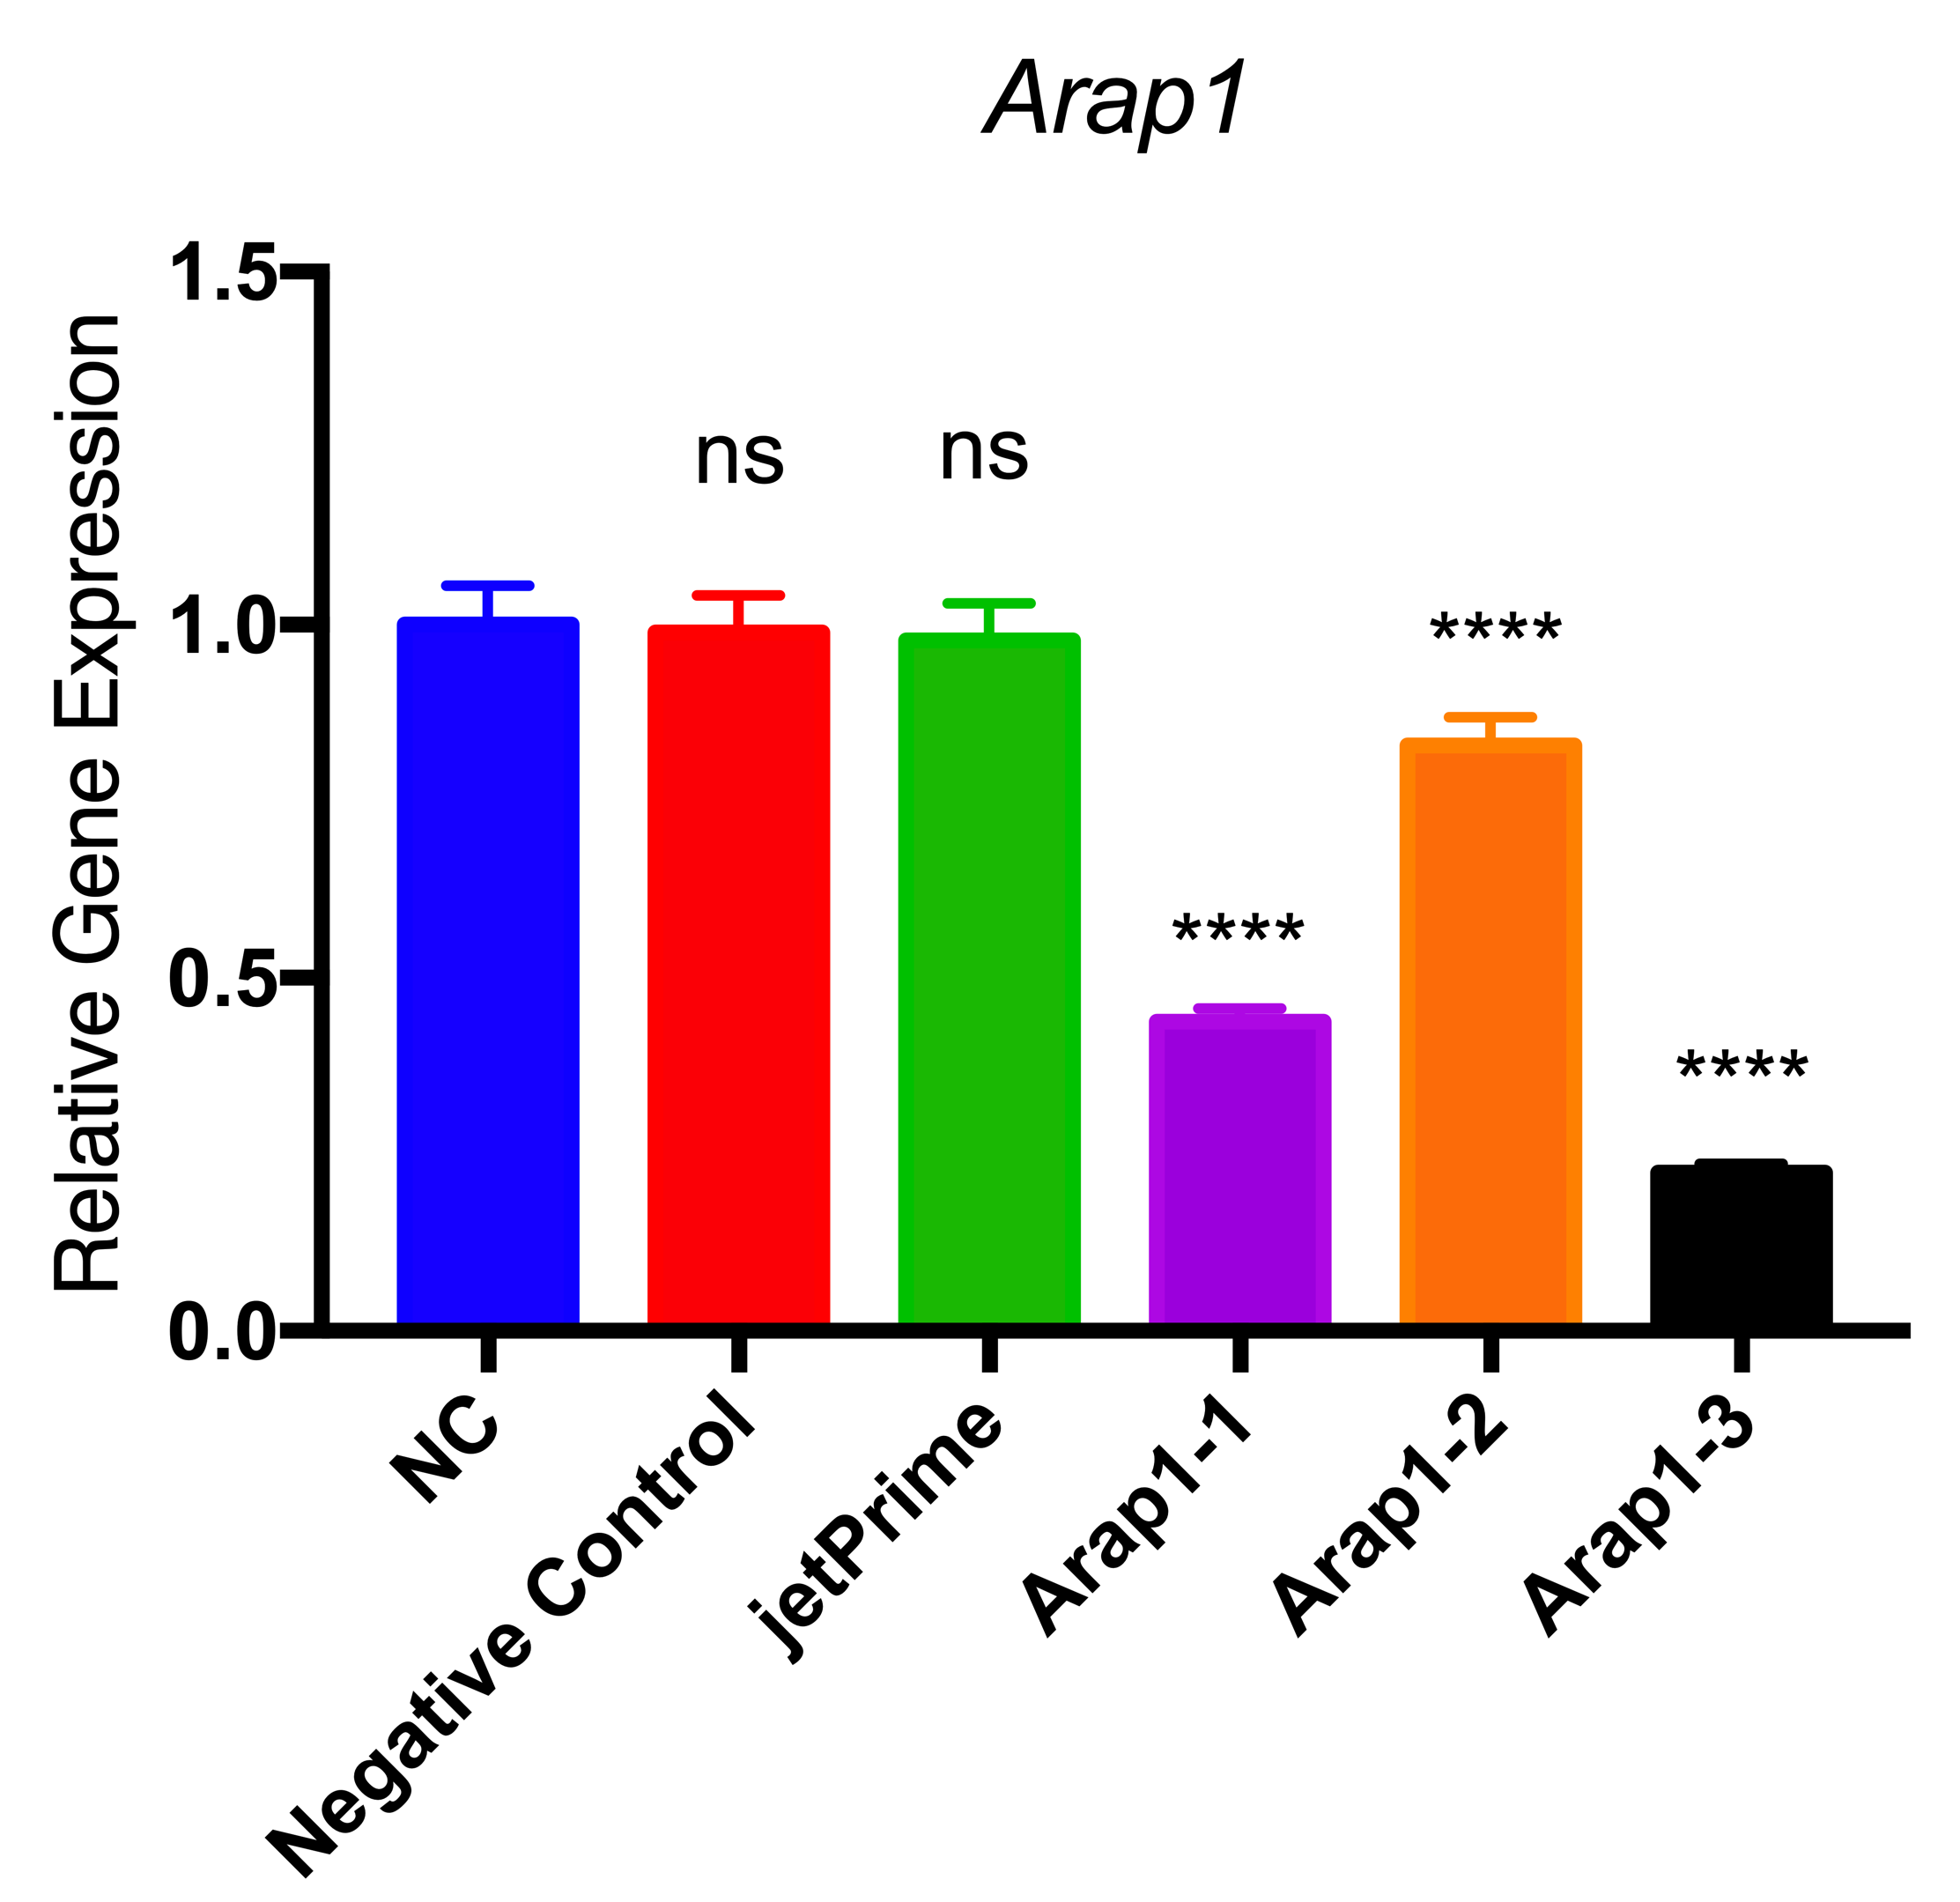


**Supplemental Fig. 1 RT-qPCR analysis of siRNA knockdown in mesangial cells.** NC: normal control group, Negative Control: negative siRNA group, jetPrime: jetPrime control group, Arap1: Arap1 siRNA sequence 1, Arap2: Arap1 siRNA sequence 2, Arap3: Arap1 siRNA sequence 3; ns: no significance vs the NC group, **** p<0.0001 vs the NC group.
